# Supplementary material for: Capacity to Consent in Healthcare: A Systematic Review and Meta-Analysis Comparing Patients with Bipolar Disorders and Schizophrenia Spectrum Disorders
Source: MDPI journal article supplement (doi:10.3390/medicina60050764), 2024-05-05

## Tables S2

Studies employing similar instruments, such as MacCAT-T and Mac-CAT-CR

## Understanding

| Study                                                                                    | No. of BD | No. of SZ | ES    | Sig.  | SE   | W       | 95% CI       |
|------------------------------------------------------------------------------------------|-----------|-----------|-------|-------|------|---------|--------------|
| Appelbaum & Redlich 2006                                                                 | 22        | 63        | 0.33  | 0.180 | 0.25 | 16.08 % | - 0.15, 0.81 |
| Cairns et al. 2005                                                                       | 29        | 84        | -0.09 | 0.680 | 0.21 | 21.37   | - 0.51, 0.33 |
| López-Jaramillo et al. 2016                                                              | 40        | 40        | 0.00  | 1.000 | 0.22 | 19.96   | - 0.43, 0.43 |
| Mandarelli et al. 2018                                                                   | 47        | 65        | 0.06  | 0.735 | 0.19 | 27.05   | - 0.31, 0.44 |
| Palmer et al. 2007                                                                       | 31        | 31        | -0.09 | 0.708 | 0.25 | 15.54   | - 0.59, 0.40 |
| Overall (random-effects model)                                                           | 169       | 283       | 0.04  | 0.707 | 0.10 | 100 %   | - 0.16, 0.23 |
| Heterogeneity: $Q=2.08$ ; $df = 4$ ( $p = 0.720$ ); $I^2 = 0.00$ ; $\text{Tau}^2 = 0.00$ |           |           |       |       |      |         |              |

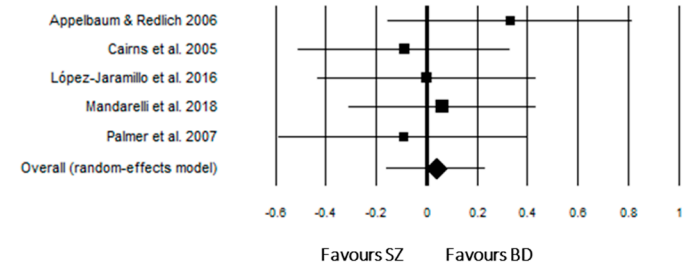

## Appreciation

| Study                                                                        | No. of BD | No. of SZ | ES     | Sig.  | SE   | W     | 95% CI       |
|------------------------------------------------------------------------------|-----------|-----------|--------|-------|------|-------|--------------|
| Appelbaum & Redlich 2006                                                     | 22        | 63        | 0.05   | 0.823 | 0.25 | 17.82 | - 0.43, 0.54 |
| Cairns et al. 2005                                                           | 29        | 84        | - 0.04 | 0.840 | 0.21 | 21.17 | - 0.46, 0.38 |
| López-Jaramillo et al. 2016                                                  | 40        | 40        | 0.00   | 1.000 | 0.22 | 20.31 | - 0.43, 0.43 |
| Mandarelli et al. 2018                                                       | 47        | 65        | 0.50   | 0.010 | 0.19 | 23.80 | 0.12, 0.87   |
| Palmer et al. 2007                                                           | 31        | 31        | 0.53   | 0.037 | 0.26 | 16.90 | 0.03, 1.03   |
| Overall (random-effects model)                                               | 169       | 283       | 0.21   | 0.102 | 0.13 | 100 % | - 0.04, 0.46 |
| Heterogeneity: $Q=6.50$ ; $df=4$ ( $p=0.165$ ); $I^2=38.43\%$ ; $Tau^2=0.03$ |           |           |        |       |      |       |              |

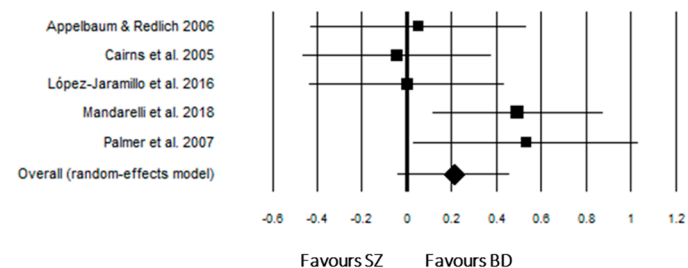

## Reasoning

| Study                                                                         | No. of BD | No. of SZ | ES     | Sig.  | SE   | W     | 95% CI       |
|-------------------------------------------------------------------------------|-----------|-----------|--------|-------|------|-------|--------------|
| Appelbaum & Redlich 2006                                                      | 22        | 63        | - 0.31 | 0.215 | 0.25 | 18.65 | - 0.79, 0.18 |
| Cairns et al. 2005                                                            | 29        | 84        | 0.00   | 0.985 | 0.21 | 20.74 | - 0.42, 0.42 |
| López-Jaramillo et al. 2016                                                   | 40        | 40        | 0.00   | 1.000 | 0.22 | 20.25 | - 0.43, 0.43 |
| Mandarelli et al. 2018                                                        | 47        | 65        | 0.65   | 0.001 | 0.20 | 22.00 | 0.27, 1.04   |
| Palmer et al. 2007                                                            | 31        | 31        | 0.18   | 0.462 | 0.25 | 18.36 | - 0.31, 0.68 |
| Overall (random-effects model)                                                | 169       | 283       | 0.12   | 0.465 | 0.17 | 100 % | - 0.21, 0.45 |
| Heterogeneity: $Q=11.05$ ; $df=4$ ( $p=0.465$ ); $I^2=63.81\%$ ; $Tau^2=0.09$ |           |           |        |       |      |       |              |

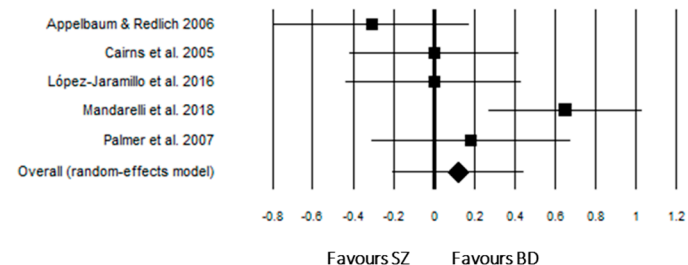

Supplement: s1 [file s1]
