# Supplementary material for: Capacity to Consent in Healthcare: A Systematic Review and Meta-Analysis Comparing Patients with Bipolar Disorders and Schizophrenia Spectrum Disorders
Source: MDPI journal article supplement (doi:10.3390/medicina60050764), 2024-05-05
Supplement: s1 [file s1]

## Tables S3

Studies enrolling patients in a clinical remission status

### Understanding

| Study                                                                      | No. of BD | No. of SZ | ES    | Sig.  | SE   | W     | 95% CI       |
|----------------------------------------------------------------------------|-----------|-----------|-------|-------|------|-------|--------------|
| Appelbaum & Redlich 2006                                                   | 22        | 63        | 0.33  | 0.180 | 0.25 | 24.88 | - 0.15, 0.81 |
| López-Jaramillo et al. 2016                                                | 40        | 40        | 0.00  | 1.000 | 0.22 | 30.34 | - 0.43, 0.43 |
| Palmer et al. 2007                                                         | 31        | 31        | -0.09 | 0.708 | 0.25 | 24.11 | - 0.59, 0.40 |
| Srebnik et al. 2004                                                        | 20        | 41        | 0.46  | 0.091 | 0.27 | 20.67 | - 0.07, 0.99 |
| Overall (random-effects model)                                             | 113       | 175       | 0.15  | 0.226 | 0.13 | 100 % | - 0.10, 0.41 |
| Heterogeneity: $Q=3.24$ ; $df=3$ ( $p=0.356$ ); $I^2=7.37$ ; $\tau^2=0.00$ |           |           |       |       |      |       |              |

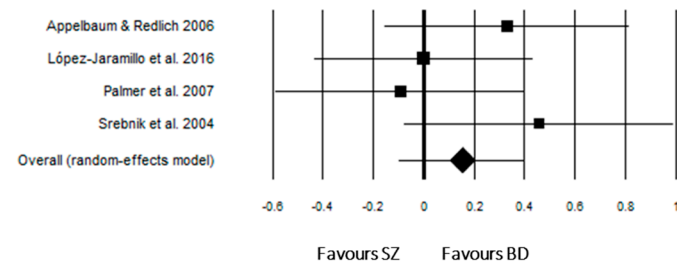

## Appreciation

| Study                                                                       | No. of BD | No. of SZ | ES   | Sig.  | SE   | W       | 95% CI       |
|-----------------------------------------------------------------------------|-----------|-----------|------|-------|------|---------|--------------|
| Appelbaum & Redlich 2006                                                    | 22        | 63        | 0.05 | 0.823 | 0.25 | 25.20 % | - 0.43, 0.54 |
| López-Jaramillo et al. 2016                                                 | 40        | 40        | 0.00 | 1.000 | 0.22 | 30.58 % | - 0.43, 0.43 |
| Palmer et al. 2007                                                          | 31        | 31        | 0.53 | 0.037 | 0.26 | 23.38 % | 0.03, 1.03   |
| Srebnik et al. 2004                                                         | 20        | 41        | 0.35 | 0.195 | 0.27 | 20.85 % | - 0.18, 0.88 |
| Overall (random-effects model)                                              | 113       | 175       | 0.21 | 0.095 | 0.13 | 100 %   | - 0.04, 0.46 |
| Heterogeneity: $Q=3.17$ ; $df=3$ ( $p=0.367$ ); $I^2=5.27\%$ ; $Tau^2=0.00$ |           |           |      |       |      |         |              |

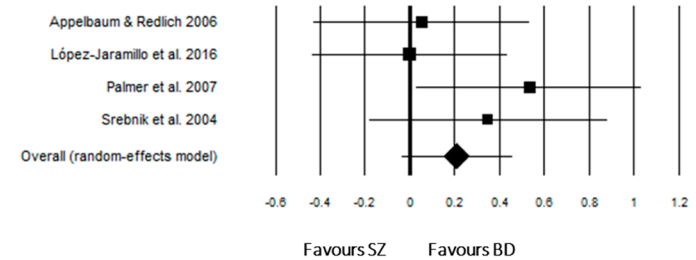

## Reasoning

| Study                                                                        | No. of BD | No. of SZ | ES     | Sig.  | SE   | W       | 95% CI       |
|------------------------------------------------------------------------------|-----------|-----------|--------|-------|------|---------|--------------|
| Appelbaum & Redlich 2006                                                     | 22        | 63        | - 0.31 | 0.215 | 0.25 | 25.07 % | - 0.79, 0.18 |
| López-Jaramillo et al. 2016                                                  | 40        | 40        | 0.00   | 1.000 | 0.22 | 28.36 % | - 0.43, 0.43 |
| Palmer et al. 2007                                                           | 31        | 31        | 0.18   | 0.462 | 0.25 | 24.49 % | - 0.31, 0.68 |
| Srebnik et al. 2004                                                          | 20        | 41        | 0.49   | 0.074 | 0.27 | 22.08 % | - 0.05, 1.02 |
| Overall (random-effects model)                                               | 113       | 175       | 0.08   | 0.632 | 0.16 | 100 %   | - 0.24, 0.39 |
| Heterogeneity: $Q=4.98$ ; $df=3$ ( $p=0.173$ ); $I^2=39.79\%$ ; $Tau^2=0.04$ |           |           |        |       |      |         |              |

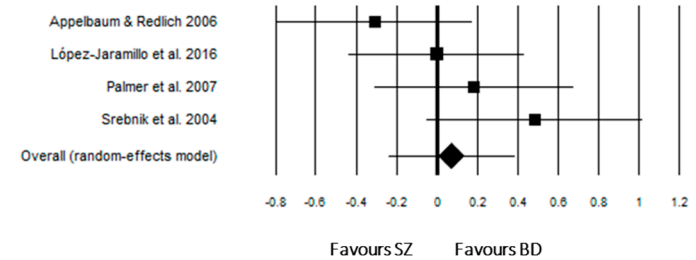

Expression of a Choice

| Study              | No. of BD | No. of SZ | ES   | Sig.  | SE   | 95% CI       |                                                                                                                                                                                                            |
|--------------------|-----------|-----------|------|-------|------|--------------|------------------------------------------------------------------------------------------------------------------------------------------------------------------------------------------------------------|
| Palmer et al. 2007 | 31        | 31        | 0.35 | 0.167 | 0.25 | - 0.15, 0.84 |                                                                                                                                                                                                            |
|                    |           |           |      |       |      |              | <div><div>Palmer et al. 2007/W1/Expressing a choice</div><div>Palmer et al. 2007/W1/Expressing a choice</div><div><div></div><div></div><div>0</div><div>Favours SZ</div><div>Favours BD</div></div></div> |
